# Supplementary material for: Prevalence and predictors of spontaneous preterm births in Nepal: findings from a prospective, population-based pregnancy cohort in rural Nepal–a secondary data analysis
Source: BMJ Open. 2022 Dec 1;12(12):e066934. doi: 10.1136/bmjopen-2022-066934 (PMC9716942; doi:10.1136/bmjopen-2022-066934)
Supplement: Supplementary data [file bmjopen-2022-066934supp001.pdf]

## SUPPLEMENTARY TABLES

Table S1. Comparing Pregnancy non-varying Variables by pregnancies Included and Excluded in the Regression Analysis

| Variables                                              | Categories                     | Total<br>N=30,758<br>N (%) | Included in<br>regression<br>N=21,297<br>N (%) | Excluded in<br>regression<br>N=9,461<br>N (%) | p-<br>value |
|--------------------------------------------------------|--------------------------------|----------------------------|------------------------------------------------|-----------------------------------------------|-------------|
| Maternal Age at LMP                                    | 18 to 35                       | 25,300 (82.3)              | 17,683 (83.0)                                  | 7,617 (80.5)                                  | <0.001      |
|                                                        | Less than 18                   | 4,792 (15.6)               | 3,169 (14.9)                                   | 1,623 (17.2)                                  |             |
|                                                        | More than 35                   | 666 ( 2.2)                 | 445 ( 2.1)                                     | 221 ( 2.3)                                    |             |
| Caste/Ethnicity<br>Categories                          | Brahmin and Chhetri            | 879 ( 2.9)                 | 661 ( 3.1)                                     | 218 ( 2.3)                                    | <0.001      |
|                                                        | Vaishya                        | 22,104 (71.9)              | 15,412 (72.4)                                  | 6,692 (70.7)                                  |             |
|                                                        | Shudra                         | 4,826 (15.7)               | 3,392 (15.9)                                   | 1,434 (15.2)                                  |             |
|                                                        | Muslim and others              | 2,919 ( 9.5)               | 1,832 ( 8.6)                                   | 1,087 (11.5)                                  |             |
|                                                        | Missing                        | 30 ( 0.1)                  | 0 ( 0.0)                                       | 30 ( 0.3)                                     |             |
| Mother's Education                                     | No schooling                   | 20,891 (67.9)              | 14,561 (68.4)                                  | 6,330 (66.9)                                  | 0.032       |
|                                                        | 1 to 5 years                   | 2,613 ( 8.5)               | 1,819 ( 8.5)                                   | 794 ( 8.4)                                    |             |
|                                                        | More than 5 years              | 7,224 (23.5)               | 4,917 (23.1)                                   | 2,307 (24.4)                                  |             |
|                                                        | Missing                        | 30 ( 0.1)                  | 0 ( 0.0)                                       | 30 ( 0.3)                                     |             |
| Quintiles of Wealth                                    | Poorest                        | 6,354 (20.7)               | 4,414 (20.7)                                   | 1,940 (20.5)                                  | 0.004       |
|                                                        | Poorer                         | 6,210 (20.2)               | 4,386 (20.6)                                   | 1,824 (19.3)                                  |             |
|                                                        | Middle                         | 6,152 (20.0)               | 4,289 (20.1)                                   | 1,863 (19.7)                                  |             |
|                                                        | Richer                         | 6,036 (19.6)               | 4,172 (19.6)                                   | 1,864 (19.7)                                  |             |
|                                                        | Richest                        | 5,985 (19.5)               | 4,036 (19.0)                                   | 1,949 (20.6)                                  |             |
|                                                        | Missing                        | 21 ( 0.1)                  | 0 ( 0.0)                                       | 21 ( 0.2)                                     |             |
| Maternal Height<br>(centimeter)                        | <145                           | 4,510 (14.7)               | 3,193 (15.0)                                   | 1,317 (13.9)                                  | 0.042       |
|                                                        | 145-<150                       | 9,227 (30.0)               | 6,413 (30.1)                                   | 2,814 (29.7)                                  |             |
|                                                        | >=150                          | 16,974 (55.2)              | 11,691 (54.9)                                  | 5,283 (55.8)                                  |             |
|                                                        | Missing                        | 47 ( 0.2)                  | 0 ( 0.0)                                       | 47 ( 0.5)                                     |             |
| Parity including both<br>LB and SB, at<br>Enrollment   | Parity 1 to 4                  | 19,805 (64.4)              | 14,137 (66.4)                                  | 5,668 (59.9)                                  | <0.001      |
|                                                        | More than 4                    | 1,351 ( 4.4)               | 875 ( 4.1)                                     | 476 ( 5.0)                                    |             |
|                                                        | Prior Pregnant but parity<br>0 | 723 ( 2.4)                 | 515 ( 2.4)                                     | 208 ( 2.2)                                    |             |
|                                                        | No Prior Pregnant              | 8,717 (28.3)               | 5,770 (27.1)                                   | 2,947 (31.1)                                  |             |
|                                                        | Missing                        | 162 ( 0.5)                 | 0 ( 0.0)                                       | 162 ( 1.7)                                    |             |
| Interpregnancy<br>Interval based on<br>maternal recall | 18 to 36 months                | 7,723 (25.1)               | 5,540 (26.0)                                   | 2,183 (23.1)                                  | <0.001      |
|                                                        | Less than 18 months            | 11,201 (36.4)              | 7,693 (36.1)                                   | 3,508 (37.1)                                  |             |
|                                                        | More than 36 months            | 3,106 (10.1)               | 2,294 (10.8)                                   | 812 ( 8.6)                                    |             |
|                                                        | No Prior Pregnancy             | 8,717 (28.3)               | 5,770 (27.1)                                   | 2,947 (31.1)                                  |             |
|                                                        | Missing                        | 11 ( 0.0)                  | 0 ( 0.0)                                       | 11 ( 0.1)                                     |             |
| Any deaths among<br>Prior LB                           | Prior LB but not died          | 17,089 (55.6)              | 12,273 (57.6)                                  | 4,816 (50.9)                                  | <0.001      |
|                                                        | Prior LB died                  | 3,518 (11.4)               | 2,555 (12.0)                                   | 963 (10.2)                                    |             |
|                                                        | Prior Pregnancy but no<br>LB   | 980 ( 3.2)                 | 699 ( 3.3)                                     | 281 ( 3.0)                                    |             |
|                                                        | No prior pregnancy             | 8,717 (28.3)               | 5,770 (27.1)                                   | 2,947 (31.1)                                  |             |
|                                                        | Missing                        | 454 ( 1.5)                 | 0 ( 0.0)                                       | 454 ( 4.8)                                    |             |
| Any prior pregnancy<br>ended in SB                     | Prior pregnancy but no<br>SB   | 20,736 (67.4)              | 14,704 (69.0)                                  | 6,032 (63.8)                                  | <0.001      |

| Variables                                       | Categories                         | Total<br>N=30,758 | Included in<br>regression<br>N=21,297 | Excluded in<br>regression<br>N=9,461 | p-<br>value |
|-------------------------------------------------|------------------------------------|-------------------|---------------------------------------|--------------------------------------|-------------|
|                                                 | Prior SB                           | 1,291 ( 4.2)      | 815 ( 3.8)                            | 476 ( 5.0)                           |             |
|                                                 | No prior pregnancy                 | 8,717 (28.3)      | 5,770 (27.1)                          | 2,947 (31.1)                         |             |
|                                                 | Missing                            | 14 ( 0.0)         | 8 ( 0.0)                              | 6 ( 0.1)                             |             |
| Any prior pregnancy ended in miscarriage?       | Prior pregnancy but no miscarriage | 18,554 (60.3)     | 12,959 (60.8)                         | 5,595 (59.1)                         | <0.001      |
|                                                 | Prior miscarriage                  | 3,478 (11.3)      | 2,565 (12.0)                          | 913 ( 9.7)                           |             |
|                                                 | No prior pregnancy                 | 8,717 (28.3)      | 5,770 (27.1)                          | 2,947 (31.1)                         |             |
|                                                 | Missing                            | 9 ( 0.0)          | 3 ( 0.0)                              | 6 ( 0.1)                             |             |
| Any prior pregnancy ended in multiples?         | Prior pregnancy but no multiples   | 21,735 (70.7)     | 15,383 (72.2)                         | 6,352 (67.1)                         | <0.001      |
|                                                 | Prior multiples                    | 286 ( 0.9)        | 135 ( 0.6)                            | 151 ( 1.6)                           |             |
|                                                 | No prior pregnancy                 | 8,717 (28.3)      | 5,770 (27.1)                          | 2,947 (31.1)                         |             |
|                                                 | Missing                            | 20 ( 0.1)         | 9 ( 0.0)                              | 11 ( 0.1)                            |             |
| Number of ANC visits                            | No visit                           | 5,431 (17.7)      | 3,788 (17.8)                          | 1,643 (17.4)                         | <0.001      |
|                                                 | 1 visit                            | 4,047 (13.2)      | 2,836 (13.3)                          | 1,211 (12.8)                         |             |
|                                                 | 2-3 visit                          | 9,443 (30.7)      | 6,809 (32.0)                          | 2,634 (27.8)                         |             |
|                                                 | 4 or more                          | 8,342 (27.1)      | 6,532 (30.7)                          | 1,810 (19.1)                         |             |
|                                                 | Missing                            | 3,495 (11.4)      | 1,332 ( 6.3)                          | 2,163 (22.9)                         |             |
| Place of Delivery                               | Home/Maiti                         | 15,669 (50.9)     | 11,348 (53.3)                         | 4,321 (45.7)                         | 0.002       |
|                                                 | HP/Clinic/Hospital                 | 11,038 (35.9)     | 8,210 (38.6)                          | 2,828 (29.9)                         |             |
|                                                 | Way to Facility/Outdoors           | 602 ( 2.0)        | 439 ( 2.1)                            | 163 ( 1.7)                           |             |
|                                                 | Missing                            | 3,449 (11.2)      | 1,300 ( 6.1)                          | 2,149 (22.7)                         |             |
| Bidi or tobacco use in pregnancy                | No                                 | 30,410 (98.9)     | 21,060 (98.9)                         | 9,350 (98.8)                         | 0.64        |
|                                                 | Yes                                | 348 ( 1.1)        | 237 ( 1.1)                            | 111 ( 1.2)                           |             |
| Alcohol use (jaard or rakshi) in pregnancy?     | No                                 | 30,665 (99.7)     | 21,230 (99.7)                         | 9,435 (99.7)                         | 0.56        |
|                                                 | Yes                                | 93 ( 0.3)         | 67 ( 0.3)                             | 26 ( 0.3)                            |             |
| Multiple Birth                                  | Singleton                          | 30,508 (99.2)     | 21,147 (99.3)                         | 9,361 (98.9)                         | 0.001       |
|                                                 | Twin/Triplet                       | 250 ( 0.8)        | 150 ( 0.7)                            | 100 ( 1.1)                           |             |
| Sex of the child                                | Female                             | 14,673 (47.7)     | 10,178 (47.8)                         | 4,495 (47.5)                         | 0.004       |
|                                                 | Male                               | 15,736 (51.2)     | 10,969 (51.5)                         | 4,767 (50.4)                         |             |
|                                                 | Twin/Triplet                       | 250 ( 0.8)        | 150 ( 0.7)                            | 100 ( 1.1)                           |             |
|                                                 | Missing                            | 99 ( 0.3)         | 0 ( 0.0)                              | 99 ( 1.0)                            |             |
| Preterm Birth                                   | Term                               | 26,130 (85.0)     | 18,363 (86.2)                         | 7,767 (82.1)                         | <0.001      |
|                                                 | Preterm                            | 4,628 (15.0)      | 2,934 (13.8)                          | 1,694 (17.9)                         |             |
| Gestational Age at outcome in weeks (Mean (SD)) |                                    | 39.4 (3.4)        | 39.5 (2.7)                            | 39.2 (4.6)                           | <0.001      |

Table S2-Comparing the Adjusted Risk Ratios for associations between risk factors and spontaneous preterm birth in different models

| Name of Variables                              | Categories                  | Model 1<br>Unadjusted Model<br><br>Risk Ratio<br>(95%CI) | Model 2<br>Adjusted Model<br>without<br>ANC/Place of<br>Delivery<br>(N=21,297)<br><br>Risk Ratio<br>(95%CI) | Model 3<br>Adjusted- Added<br>ANC<br>(N=19,965)<br><br>Risk Ratio<br>(95%CI) | Model 4<br>Adjusted- Added<br>ANC and Place<br>of Delivery<br>(N=19,964)<br><br>Risk Ratio<br>(95%CI) |
|------------------------------------------------|-----------------------------|----------------------------------------------------------|-------------------------------------------------------------------------------------------------------------|------------------------------------------------------------------------------|-------------------------------------------------------------------------------------------------------|
| Maternal Age at LMP                            | 18 to 35                    | 1.00 [1.00,1.00]                                         | 1.00 [1.00,1.00]                                                                                            | 1.00 [1.00,1.00]                                                             | 1.00 [1.00,1.00]                                                                                      |
|                                                | Less than 18                | 1.19*** [1.11,1.28]                                      | 1.13* [1.02,1.26]                                                                                           | 1.11 [1.00,1.24]                                                             | 1.11* [1.00,1.24]                                                                                     |
|                                                | More than 35                | 1.57*** [1.36,1.81]                                      | 1.22 [0.98,1.51]                                                                                            | 1.20 [0.97,1.49]                                                             | 1.20 [0.97,1.49]                                                                                      |
| Caste/Ethnicity Categories                     | Brahmin and Chhetri         | 1.00 [1.00,1.00]                                         | 1.00 [1.00,1.00]                                                                                            | 1.00 [1.00,1.00]                                                             | 1.00 [1.00,1.00]                                                                                      |
|                                                | Vaishya                     | 1.33** [1.09,1.62]                                       | 1.23 [0.95,1.59]                                                                                            | 1.19 [0.92,1.54]                                                             | 1.20 [0.92,1.54]                                                                                      |
|                                                | Shudra                      | 1.55*** [1.26,1.90]                                      | 1.23 [0.94,1.62]                                                                                            | 1.18 [0.90,1.55]                                                             | 1.18 [0.90,1.55]                                                                                      |
|                                                | Muslim and others           | 1.96*** [1.60,2.42]                                      | 1.53** [1.16,2.01]                                                                                          | 1.53** [1.16,2.01]                                                           | 1.53** [1.16,2.02]                                                                                    |
| Mother's Years of Education                    | No schooling                | 1.00 [1.00,1.00]                                         | 1.00 [1.00,1.00]                                                                                            | 1.00 [1.00,1.00]                                                             | 1.00 [1.00,1.00]                                                                                      |
|                                                | 1 to 5 years                | 0.86** [0.78,0.95]                                       | 0.91 [0.80,1.03]                                                                                            | 0.95 [0.83,1.08]                                                             | 0.95 [0.83,1.08]                                                                                      |
|                                                | More than 5 years           | 0.71*** [0.66,0.76]                                      | 0.81*** [0.73,0.90]                                                                                         | 0.85** [0.77,0.95]                                                           | 0.85** [0.76,0.94]                                                                                    |
| Quintiles of Wealth                            | Poorest                     | 1.00 [1.00,1.00]                                         | 1.00 [1.00,1.00]                                                                                            | 1.00 [1.00,1.00]                                                             | 1.00 [1.00,1.00]                                                                                      |
|                                                | Poorer                      | 0.86*** [0.79,0.93]                                      | 0.90* [0.82,1.00]                                                                                           | 0.91 [0.83,1.01]                                                             | 0.91 [0.83,1.01]                                                                                      |
|                                                | Middle                      | 0.89** [0.82,0.96]                                       | 0.95 [0.86,1.05]                                                                                            | 0.98 [0.88,1.08]                                                             | 0.97 [0.88,1.08]                                                                                      |
|                                                | Richer                      | 0.73*** [0.67,0.79]                                      | 0.83** [0.74,0.93]                                                                                          | 0.88* [0.78,0.98]                                                            | 0.87* [0.78,0.98]                                                                                     |
|                                                | Richest                     | 0.71*** [0.65,0.77]                                      | 0.88* [0.78,1.00]                                                                                           | 0.91 [0.80,1.03]                                                             | 0.90 [0.80,1.02]                                                                                      |
| Mother's height(centimeter)                    | <145                        | 1.00 [1.00,1.00]                                         | 1.00 [1.00,1.00]                                                                                            | 1.00 [1.00,1.00]                                                             | 1.00 [1.00,1.00]                                                                                      |
|                                                | 145-<150                    | 0.93 [0.86,1.01]                                         | 0.98 [0.88,1.08]                                                                                            | 0.98 [0.89,1.09]                                                             | 0.99 [0.89,1.09]                                                                                      |
|                                                | >=150                       | 0.81*** [0.75,0.87]                                      | 0.89* [0.81,0.98]                                                                                           | 0.90* [0.82,1.00]                                                            | 0.91 [0.82,1.00]                                                                                      |
| Parity including both LB and SB, at Enrollment | Parity 1 to 4               | 1.00 [1.00,1.00]                                         | 1.00 [1.00,1.00]                                                                                            | 1.00 [1.00,1.00]                                                             | 1.00 [1.00,1.00]                                                                                      |
|                                                | More than 4                 | 1.32*** [1.17,1.48]                                      | 1.17 [0.99,1.37]                                                                                            | 1.11 [0.95,1.31]                                                             | 1.12 [0.95,1.31]                                                                                      |
|                                                | Prior Pregnant but parity 0 | 1.02 [0.85,1.22]                                         | 0.92 [0.62,1.37]                                                                                            | 1.12 [0.73,1.73]                                                             | 1.11 [0.72,1.72]                                                                                      |
|                                                | No Prior Pregnant           | 1.10** [1.04,1.17]                                       | 1.15** [1.04,1.28]                                                                                          | 1.20** [1.07,1.34]                                                           | 1.19** [1.07,1.33]                                                                                    |
| Interpregnancy Intervals                       | 18 to 36 months             | 1.00 [1.00,1.00]                                         | 1.00 [1.00,1.00]                                                                                            | 1.00 [1.00,1.00]                                                             | 1.00 [1.00,1.00]                                                                                      |
|                                                | Less than 18 months         | 1.07 [0.99,1.14]                                         | 1.08 [0.99,1.18]                                                                                            | 1.09 [0.99,1.19]                                                             | 1.09 [0.99,1.19]                                                                                      |
|                                                | More than 36 months         | 0.98 [0.89,1.09]                                         | 0.90 [0.79,1.02]                                                                                            | 0.93 [0.82,1.06]                                                             | 0.93 [0.82,1.06]                                                                                      |
|                                                | No Prior Pregnancy          | 1.11** [1.03,1.20]                                       | 1.00 [1.00,1.00]                                                                                            | 1.00 [1.00,1.00]                                                             | 1.00 [1.00,1.00]                                                                                      |
| Any death among prior LB                       | Prior LB but not died       | 1.00 [1.00,1.00]                                         | 1.00 [1.00,1.00]                                                                                            | 1.00 [1.00,1.00]                                                             | 1.00 [1.00,1.00]                                                                                      |
|                                                | Prior LB died               | 1.19*** [1.09,1.29]                                      | 1.07 [0.97,1.19]                                                                                            | 1.07 [0.96,1.20]                                                             | 1.07 [0.96,1.20]                                                                                      |
|                                                | Prior Pregnancy but no LB   | 1.07 [0.92,1.25]                                         | 1.06 [0.75,1.49]                                                                                            | 0.97 [0.66,1.41]                                                             | 0.96 [0.66,1.41]                                                                                      |
|                                                | No prior pregnancy          | 1.12*** [1.06,1.19]                                      |                                                                                                             |                                                                              |                                                                                                       |

| Name of Variables                                           | Categories                         | Model 1<br>Unadjusted Model<br><br>Risk Ratio<br>(95%CI) | Model 2<br>Adjusted Model<br>without<br>ANC/Place of<br>Delivery<br>(N=21,297)<br><br>Risk Ratio<br>(95%CI) | Model 3<br>Adjusted- Added<br>ANC<br>(N=19,965)<br><br>Risk Ratio<br>(95%CI) | Model 4<br>Adjusted- Added<br>ANC and Place<br>of Delivery<br>(N=19,964)<br><br>Risk Ratio<br>(95%CI) |
|-------------------------------------------------------------|------------------------------------|----------------------------------------------------------|-------------------------------------------------------------------------------------------------------------|------------------------------------------------------------------------------|-------------------------------------------------------------------------------------------------------|
| Any prior pregnancy ended in SB                             | Prior pregnancy but no SB          | 1.00 [1.00,1.00]                                         |                                                                                                             |                                                                              |                                                                                                       |
|                                                             | Prior SB                           | 1.08 [0.94,1.23]                                         |                                                                                                             |                                                                              |                                                                                                       |
|                                                             | No prior pregnancy                 | 1.08** [1.02,1.15]                                       |                                                                                                             |                                                                              |                                                                                                       |
| Any prior pregnancy ended in miscarriage                    | Prior pregnancy but no miscarriage | 1.00 [1.00,1.00]                                         |                                                                                                             |                                                                              |                                                                                                       |
|                                                             | Prior miscarriage                  | 0.94 [0.86,1.03]                                         |                                                                                                             |                                                                              |                                                                                                       |
|                                                             | No prior pregnancy                 | 1.07* [1.01,1.13]                                        |                                                                                                             |                                                                              |                                                                                                       |
| Any prior pregnancy ended in multiples                      | Prior pregnancy but no multiples   | 1.00 [1.00,1.00]                                         |                                                                                                             |                                                                              |                                                                                                       |
|                                                             | Prior multiples                    | 1.14 [0.87,1.49]                                         |                                                                                                             |                                                                              |                                                                                                       |
|                                                             | No prior pregnancy                 | 1.08** [1.02,1.14]                                       |                                                                                                             |                                                                              |                                                                                                       |
| Number of ANC Visits                                        | No visit                           | 1.00 [1.00,1.00]                                         |                                                                                                             | 1.00 [1.00,1.00]                                                             | 1.00 [1.00,1.00]                                                                                      |
|                                                             | 1 visit                            | 0.98 [0.89,1.07]                                         |                                                                                                             | 1.00 [0.90,1.12]                                                             | 1.00 [0.90,1.12]                                                                                      |
|                                                             | 2-3 visit                          | 0.92* [0.85,0.99]                                        |                                                                                                             | 0.94 [0.86,1.03]                                                             | 0.93 [0.85,1.02]                                                                                      |
|                                                             | 4 or more                          | 0.54*** [0.50,0.59]                                      |                                                                                                             | 0.64*** [0.57,0.71]                                                          | 0.62*** [0.56,0.70]                                                                                   |
| Place of Delivery                                           | Home/Maiti                         | 1.00 [1.00,1.00]                                         |                                                                                                             |                                                                              | 1.00 [1.00,1.00]                                                                                      |
|                                                             | HP/Clinic/Hospital                 | 0.84*** [0.79,0.89]                                      |                                                                                                             |                                                                              | 1.04 [0.96,1.12]                                                                                      |
|                                                             | Way to Facility/Outdoors           | 1.28** [1.09,1.51]                                       |                                                                                                             |                                                                              | 1.23 [1.00,1.52]                                                                                      |
| Multiple Birth                                              | Singleton                          | 1.00 [1.00,1.00]                                         | 1.00 [1.00,1.00]                                                                                            | 1.00 [1.00,1.00]                                                             | 1.00 [1.00,1.00]                                                                                      |
|                                                             | Twin/Triplet                       | 3.92*** [3.52,4.38]                                      | 4.91*** [4.20,5.75]                                                                                         | 4.97*** [4.25,5.82]                                                          | 4.96*** [4.24,5.81]                                                                                   |
| Sex of the Child                                            | Female                             | 1.00 [1.00,1.00]                                         | 1.00 [1.00,1.00]                                                                                            | 1.00 [1.00,1.00]                                                             | 1.00 [1.00,1.00]                                                                                      |
|                                                             | Male                               | 1.10*** [1.04,1.17]                                      | 1.10** [1.02,1.17]                                                                                          | 1.08* [1.01,1.16]                                                            | 1.08* [1.01,1.16]                                                                                     |
|                                                             | Twin/Triplet                       | 4.13*** [3.69,4.63]                                      | 1.00 [1.00,1.00]                                                                                            | 1.00 [1.00,1.00]                                                             | 1.00 [1.00,1.00]                                                                                      |
| STI in at least one visit of 2nd trimester?                 | No                                 | 1.00 [1.00,1.00]                                         |                                                                                                             |                                                                              |                                                                                                       |
|                                                             | Yes                                | 0.99 [0.92,1.07]                                         |                                                                                                             |                                                                              |                                                                                                       |
| STI in at least one visit of 3rd trimester?                 | No                                 | 1.00 [1.00,1.00]                                         |                                                                                                             |                                                                              |                                                                                                       |
|                                                             | Yes                                | 1.01 [0.92,1.12]                                         |                                                                                                             |                                                                              |                                                                                                       |
| Respiratory Problem in at least one visit of 2nd trimester? | No                                 | 1.00 [1.00,1.00]                                         | 1.00 [1.00,1.00]                                                                                            | 1.00 [1.00,1.00]                                                             | 1.00 [1.00,1.00]                                                                                      |
|                                                             | Yes                                | 1.00 [0.94,1.06]                                         | 1.08 [1.00,1.16]                                                                                            | 1.09* [1.01,1.18]                                                            | 1.09* [1.01,1.18]                                                                                     |
| Respiratory Problem in at least one visit of 3rd trimester? | No                                 | 1.00 [1.00,1.00]                                         | 1.00 [1.00,1.00]                                                                                            | 1.00 [1.00,1.00]                                                             | 1.00 [1.00,1.00]                                                                                      |
|                                                             | Yes                                | 0.85*** [0.79,0.92]                                      | 0.86** [0.79,0.94]                                                                                          | 0.86** [0.78,0.94]                                                           | 0.86** [0.78,0.94]                                                                                    |
| GI Problem in at least one visit of 2nd trimester?          | No                                 | 1.00 [1.00,1.00]                                         |                                                                                                             |                                                                              |                                                                                                       |
|                                                             | Yes                                | 1.08 [0.98,1.18]                                         |                                                                                                             |                                                                              |                                                                                                       |
| GI Problem in at least one visit of 3rd trimester?          | No                                 | 1.00 [1.00,1.00]                                         |                                                                                                             |                                                                              |                                                                                                       |
|                                                             | Yes                                | 1.04 [0.94,1.16]                                         |                                                                                                             |                                                                              |                                                                                                       |

| Name of Variables                                                          | Categories          | Model 1<br>Unadjusted Model<br><br>Risk Ratio<br>(95%CI) | Model 2<br>Adjusted Model<br>without<br>ANC/Place of<br>Delivery<br>(N=21,297)<br><br>Risk Ratio<br>(95%CI) | Model 3<br>Adjusted- Added<br>ANC<br>(N=19,965)<br><br>Risk Ratio<br>(95%CI) | Model 4<br>Adjusted- Added<br>ANC and Place<br>of Delivery<br>(N=19,964)<br><br>Risk Ratio<br>(95%CI) |
|----------------------------------------------------------------------------|---------------------|----------------------------------------------------------|-------------------------------------------------------------------------------------------------------------|------------------------------------------------------------------------------|-------------------------------------------------------------------------------------------------------|
| Poor appetite, nausea & vomiting in at least one visit of 2nd trimester?   | No                  | 1.00 [1.00,1.00]                                         | 1.00 [1.00,1.00]                                                                                            | 1.00 [1.00,1.00]                                                             | 1.00 [1.00,1.00]                                                                                      |
|                                                                            | Yes                 | 0.81 <sup>***</sup> [0.77,0.86]                          | 0.86 <sup>***</sup> [0.80,0.92]                                                                             | 0.88 <sup>***</sup> [0.82,0.94]                                              | 0.88 <sup>***</sup> [0.81,0.94]                                                                       |
| Poor appetite, nausea & vomiting in at least one visit of 3rd trimester?   | No                  | 1.00 [1.00,1.00]                                         | 1.00 [1.00,1.00]                                                                                            | 1.00 [1.00,1.00]                                                             | 1.00 [1.00,1.00]                                                                                      |
|                                                                            | Yes                 | 0.88 <sup>**</sup> [0.82,0.95]                           | 0.86 <sup>***</sup> [0.79,0.94]                                                                             | 0.87 <sup>**</sup> [0.79,0.95]                                               | 0.87 <sup>**</sup> [0.79,0.95]                                                                        |
| Vaginal Bleeding in at least one visit of 2nd trimester?                   | No                  | 1.00 [1.00,1.00]                                         | 1.00 [1.00,1.00]                                                                                            | 1.00 [1.00,1.00]                                                             | 1.00 [1.00,1.00]                                                                                      |
|                                                                            | Yes                 | 0.91 [0.71,1.17]                                         | 0.84 [0.62,1.16]                                                                                            | 0.83 [0.60,1.14]                                                             | 0.83 [0.60,1.15]                                                                                      |
| Vaginal Bleeding in at least one visit of 3rd trimester?                   | No                  | 1.00 [1.00,1.00]                                         | 1.00 [1.00,1.00]                                                                                            | 1.00 [1.00,1.00]                                                             | 1.00 [1.00,1.00]                                                                                      |
|                                                                            | Yes                 | 1.44 <sup>*</sup> [1.05,1.98]                            | 1.53 <sup>*</sup> [1.08,2.18]                                                                               | 1.49 <sup>*</sup> [1.04,2.13]                                                | 1.50 <sup>*</sup> [1.04,2.15]                                                                         |
| Swelling in at least one visit of 2nd trimester?                           | No                  | 1.00 [1.00,1.00]                                         | 1.00 [1.00,1.00]                                                                                            | 1.00 [1.00,1.00]                                                             | 1.00 [1.00,1.00]                                                                                      |
|                                                                            | Yes                 | 1.32 <sup>***</sup> [1.12,1.55]                          | 1.19 [0.98,1.46]                                                                                            | 1.21 [0.98,1.48]                                                             | 1.21 [0.99,1.48]                                                                                      |
| Swelling in at least one visit of 3rd trimester?                           | No                  | 1.00 [1.00,1.00]                                         | 1.00 [1.00,1.00]                                                                                            | 1.00 [1.00,1.00]                                                             | 1.00 [1.00,1.00]                                                                                      |
|                                                                            | Yes                 | 1.25 <sup>**</sup> [1.09,1.44]                           | 1.37 <sup>***</sup> [1.17,1.60]                                                                             | 1.36 <sup>***</sup> [1.15,1.60]                                              | 1.36 <sup>***</sup> [1.15,1.60]                                                                       |
| High Systolic BP in one visit of 2nd trimester?                            | Normal Systolic BP  | 1.00 [1.00,1.00]                                         | 1.00 [1.00,1.00]                                                                                            | 1.00 [1.00,1.00]                                                             | 1.00 [1.00,1.00]                                                                                      |
|                                                                            | High Systolic BP    | 0.89 [0.59,1.34]                                         | 0.67 [0.40,1.12]                                                                                            | 0.65 [0.39,1.09]                                                             | 0.65 [0.39,1.09]                                                                                      |
| High Systolic BP in one visit of 3rd trimester?                            | Normal Systolic BP  | 1.00 [1.00,1.00]                                         | 1.00 [1.00,1.00]                                                                                            | 1.00 [1.00,1.00]                                                             | 1.00 [1.00,1.00]                                                                                      |
|                                                                            | High Systolic BP    | 1.92 <sup>***</sup> [1.52,2.41]                          | 1.47 <sup>*</sup> [1.08,2.01]                                                                               | 1.49 <sup>*</sup> [1.08,2.07]                                                | 1.49 <sup>*</sup> [1.07,2.07]                                                                         |
| High Diastolic BP in one visit of 2nd trimester?                           | Normal diastolic BP | 1.00 [1.00,1.00]                                         | 1.00 [1.00,1.00]                                                                                            | 1.00 [1.00,1.00]                                                             | 1.00 [1.00,1.00]                                                                                      |
|                                                                            | High diastolic BP   | 1.34 <sup>**</sup> [1.12,1.60]                           | 1.09 [0.85,1.40]                                                                                            | 1.06 [0.82,1.37]                                                             | 1.06 [0.82,1.38]                                                                                      |
| High Diastolic BP in one visit of 3rd trimester?                           | Normal diastolic BP | 1.00 [1.00,1.00]                                         | 1.00 [1.00,1.00]                                                                                            | 1.00 [1.00,1.00]                                                             | 1.00 [1.00,1.00]                                                                                      |
|                                                                            | High diastolic BP   | 1.57 <sup>***</sup> [1.37,1.80]                          | 1.41 <sup>***</sup> [1.17,1.70]                                                                             | 1.35 <sup>**</sup> [1.12,1.64]                                               | 1.35 <sup>**</sup> [1.12,1.64]                                                                        |
| Average weight in 3rd trimester minus Average weight in 2nd trimester (kg) |                     | 0.88 <sup>***</sup> [0.87,0.90]                          | 0.89 <sup>***</sup> [0.87,0.90]                                                                             | 0.89 <sup>***</sup> [0.87,0.90]                                              | 0.89 <sup>***</sup> [0.87,0.90]                                                                       |

\*  $p < 0.05$ , \*\*  $p < 0.01$ , \*\*\*  $p < 0.001$
